# Supplementary material
Source: PubMed Central journal article supplement (PMC6740235)
Supplement: NIHMS1047506-supplement-Sup.pdf [file NIHMS1047506-supplement-Sup.pdf]

**1 SUPPLEMENTARY INFORMATION****2 Supplementary Table S1. EC50 values for Acidification and Strain Variation Experiments.**

| <b>A. Acidification Experiment</b>    |         |            |
|---------------------------------------|---------|------------|
| Treatment                             | EC50 pH | Std. Error |
| HCl                                   | 5.18    | 0.004595   |
| Spent medium                          | 5.29    | 0.008261   |
| D-lactic acid                         | 5.22    | 0.007991   |
| L-lactic acid                         | 5.20    | 0.007128   |
|                                       |         |            |
| <b>B. Strain Variation Experiment</b> |         |            |
| Strain                                | EC50 pH | Std. error |
| IL13.2                                | 5.24    | 0.00811    |
| S08                                   | 5.49    | 0.00945    |
| VT1                                   | 5.34    | 0.0229     |
| VT1*                                  | 5.19    | 0.00543    |

3

4

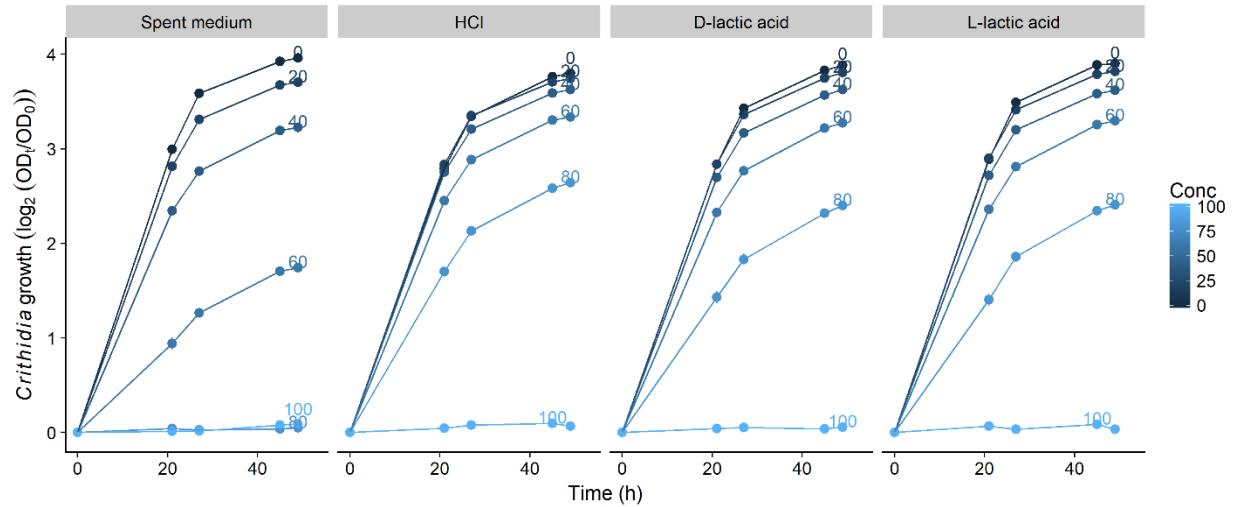

5

6 **Supplementary Figure 1. Growth curves for *C. bombi* (Strain VT1) grown in different dilutions of *L.***7 ***bombicola* spent medium or acidified MRS medium (initial pH of 4.65 (spent medium), 4.73 (HCl), 4.82**8 **(D-lactic acid), and 4.77 (L-lactic acid)). X-axis shows incubation time. Y-axis shows approximate number**9 **of cell divisions, computed as log<sub>2</sub> ratio of optical density (630 nm) to initial optical density (OD = 0.010).**10 **Differently labeled and colored lines indicate percentage of acidified medium in MRS fraction. Because**11 **MRS medium was combined with equal volumes of fresh FPFB medium, this percentage is twice the final**12 **concentration to which cells were exposed. Points and error bars (in most cases not visible, because**13 **they are smaller than the points) show mean ± 1 standard error for 12 replicate wells per treatment.**

14

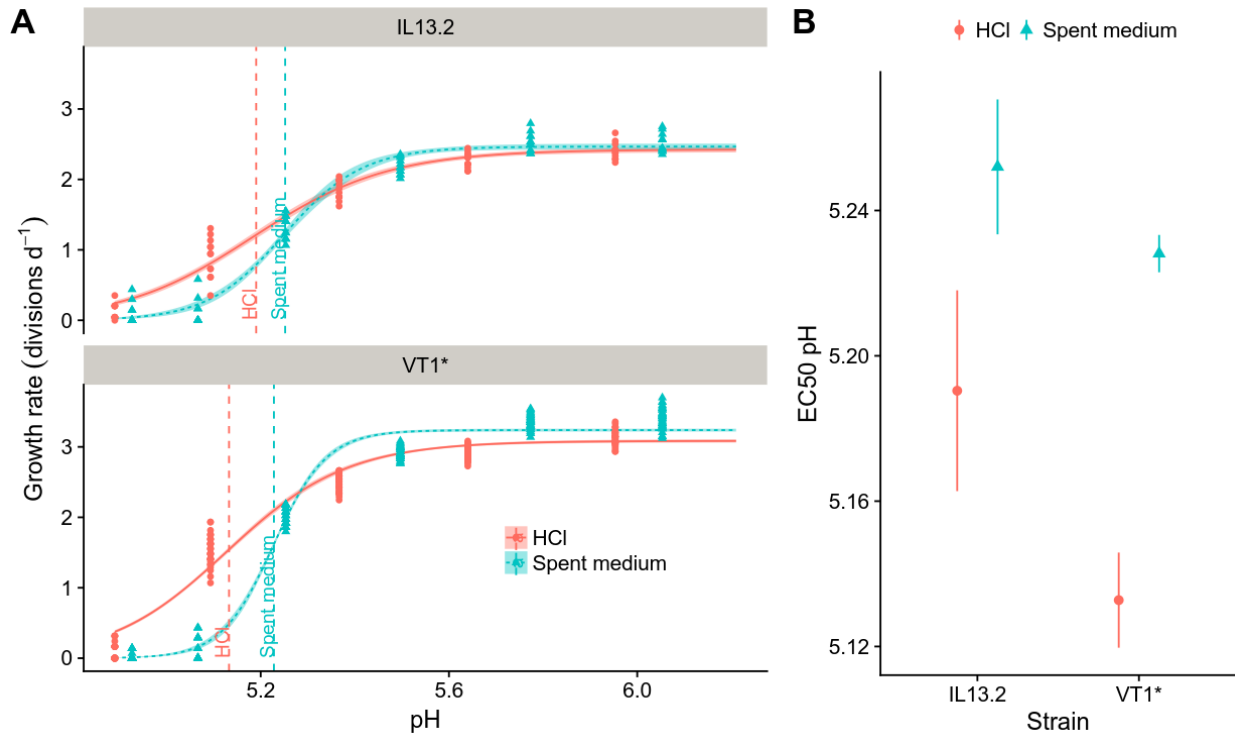

15

16 **Supplementary Figure 2: In both strains tested, spent medium inhibited *C. bombi* growth at a higher**  
 17 **pH than did acidified medium (MRS medium acidified with 1M HCl). (A) Dose-response curves relating**  
 18 **pH to growth rate for different *C. bombi* strains (panels) and sources of acidity (lines). X-axis shows pH**  
 19 **of treatment medium after combination with equal volume of fresh FPFB medium. Y-axis shows growth**  
 20 **rate over the initial 20 h incubation period, in number of doublings per day, based on OD. Lines and**  
 21 **shaded bands show fitted means  $\pm$  SE based on log-logistic model fit. Vertical lines indicate EC50 pH.**  
 22 **Points show growth rates for each replicate well. Red lines and circles: spent medium. Blue lines and**  
 23 **triangles: acidified medium. (B) 50% inhibitory concentrations (EC50) for each strain and source of**  
 24 **acidity. Point estimates and 95% confidence intervals are derived from model fits shown in panel (A).**

25

- 26 **Supplementary Data S1 (xlsx). Full model parameters and raw data** for Acidification and Strain  
27 Variation Experiments. Each experiment (Acidification and Strain Variation) has a sheet for raw data  
28 (\_data), model summary (\_parameters), and 95% confidence intervals for EC50 ratios (\_comparisons).

29
